# Supplementary material for: Drought-Induced Responses in Maize under Different Vapor Pressure Deficit Conditions
Source: MDPI journal article supplement (doi:10.3390/plants11202771), 2022-10-19
Supplement: s1 [file s1]

Mura Jyostna Devi <sup>1,2,3\*</sup>, Vangimalla R Reddy <sup>1</sup> and Dennis Timlin <sup>1</sup>

<sup>1</sup> USDA-ARS, Adaptive Cropping Systems Laboratory, Beltsville, MD 20705, USA

<sup>2</sup> USDA-ARS; Vegetable Crops Research Unit, Madison, WI 53706, USA

<sup>3</sup> Dept. of Horticulture, University of Wisconsin-Madison, WI 53706, USA

\* Correspondence: Jyostna.mura@usda.gov; Tel.: (+16082654745, MJD)

Received: 27 August 2022; Accepted: 18 October 2022; Published: 19 October 2022

Supplementary Table S1: Table S1: Average temperature (°C), RH (%) and calculated VPD (vapor pressure deficit, kPa) with  $\pm$  S.E. maintained in three chambers (low, medium and high VPD levels) during experiment 1 and experiment 2.

| Treatment           | Average temperature (°C) | Average RH (%) | Range of VPD (kPa) |
|---------------------|--------------------------|----------------|--------------------|
| <b>Experiment 1</b> |                          |                |                    |
| Low VPD             | 21.8 $\pm$ 2.1           | 65.2 $\pm$ 5.3 | 0.9 to 1.2 kPa     |
| Medium VPD          | 28.4 $\pm$ 1.8           | 48.1 $\pm$ 5.5 | 1.9 to 2.1 kPa     |
| High VPD            | 35.2 $\pm$ 2.0           | 30.2 $\pm$ 4.3 | 3.8 to 4.0 kPa     |
| <b>Experiment 2</b> |                          |                |                    |
| Low VPD             | 21.5 $\pm$ 1.9           | 64.2 $\pm$ 4.8 | 0.9 to 1.2 kPa     |
| Medium VPD          | 28.3 $\pm$ 1.7           | 47.3 $\pm$ 5.4 | 1.9 to 2.1 kPa     |
| High VPD            | 34.8 $\pm$ 2.0           | 31.0 $\pm$ 3.4 | 3.8 to 4.0 kPa     |

Supplementary Table S2: Table S2: Genes name, accession number, forward number, reverse number, and primer efficiency of twelve drought responsive gene transcripts measured in response to drought and evaporative demand

| Gene name                                                                     | Accession number | Forward primer       | Reverse primer       | Primer efficiency |
|-------------------------------------------------------------------------------|------------------|----------------------|----------------------|-------------------|
| ABA response element                                                          | GRMZM2G106622    | TTCCAAGGGTTTCACAGACC | AACTATGCCAGCGATATGGG | 2.10              |
| ABA response element binding factor 1                                         | GRMZM2G168079    | TGGAGACCGTGTAAGCACAG | AGAAAAGGCTCAGGCAATCA | 2.00              |
| APETELA2(AP2/ERF)<br>APETALA2/Ethylene<br>Response Element Binding<br>Factors | GRMZM2G018336    | TCACAGAACAAGAACGGCAG | AAGTCAAGATCGTCGGGCTA | 2.00              |
| bHLH                                                                          | GRMZM2G040349    | CAGCAACAGCAACCTCAAAA | CCTTGGCTCTTGGAACCTTG | 2.01              |
| bZIP                                                                          | GRMZM2G060216    | ACTTCATCGGGACAGAGAGC | TTTACACCCTCCCTCACCAG | 1.99              |
| DREB                                                                          | GRMZM5G889719    | ACTTCATCGGGACAGAGAGC | CTGCTGCTTTGTGTTGAGGA | 1.99              |
| DREB1A                                                                        | GRMZM2G124037    | TCTAATTGGCGGCATAGAGG | TGGAGTTCGAGACCCTGTTC | 2.00              |
| HSF2 (Heat shock protein<br>factor)                                           | GRMZM2G384339    | GCAAAGCTTCCACTAGCCAC | TTCGTTTCGTTTCGCTTCTT | 2.01              |
| MYB                                                                           | GRMZM2G064197    | CTTAGGAGGAGGCAGACACG | CTGCTGCTTTGTGTTGAGGA | 1.98              |
| NAC                                                                           | GRMZM2G027309    | GGCACTGGAGAGGATGAGAG | ATTCAGCAGCCATTGATTCC | 2.02              |
| WRKY                                                                          | GRMZM2G063880    | TCTAATTGGCGGCATAGAGG | TGGAGTTCGAGACCCTGTTC | 1.89              |
| Zinc Finger                                                                   | GRMZM2G158162    | AGCTGGCGATACAGTGACCT | ACAGTATTTGTGGCCTTCCG | 2.02              |

---

|                               |                |                        |                      |      |
|-------------------------------|----------------|------------------------|----------------------|------|
| Elongation factor 1-A (EF1-A) | NM_001112117.2 | GTGAAGAATGTTGCTGTGAAGG | GCACAGCACCAGACAGATAG | 1.99 |
| Beta tubulin 7 (tub7)         | NM_001112218.1 | GAGGAGGAAGAAGAGGAAGAGA | CATCACCACACGAACCTCAA | 2.02 |
